# Supplementary material
Source: MDPI journal article supplement (https://www.mdpi.com/2306-5710/10/2/24)
Supplement: s1 [file s1]

# Aromatic Characterization of Graševina Wines from Slavonia and Podunavlje Sub-Regions

Table S1. Analyzed commercial wines and their producers with identification names and vintages.

| Sample name and<br>producer number (P) | Sample<br>ID | Sub-region:                    | Vintage |
|----------------------------------------|--------------|--------------------------------|---------|
|                                        |              | Slavonia (S)<br>Podunavlje (P) |         |
| Graševina (P1)                         | G1           | S                              | 2020    |
| Graševina (P1)                         | G2           | S                              | 2021    |
| Graševina (P3)                         | G3           | P                              | 2020    |
| Graševina (P3)                         | G4           | P                              | 2020    |
| Graševina (P4)                         | G5           | S                              | 2020    |
| Graševina (P4)                         | G6           | S                              | 2020    |
| Graševina (P2)                         | G7           | S                              | 2020    |
| Graševina (P2)                         | G8           | S                              | 2020    |
| Graševina (P2)                         | G9           | S                              | 2020    |
| Graševina (P13)                        | G10          | P                              | 2021    |
| Graševina (P13)                        | G11          | P                              | 2021    |
| Graševina (P10)                        | G12          | S                              | 2021    |
| Graševina (P8)                         | G13          | S                              | 2020    |
| Graševina (P1)                         | G14          | S                              | 2019    |
| Graševina (P1)                         | G15          | S                              | 2021    |
| Graševina (P5)                         | G16          | S                              | 2020    |
| Graševina (P14)                        | G17          | P                              | 2020    |
| Graševina (P8)                         | G18          | S                              | 2020    |
| Graševina (P14)                        | G19          | P                              | 2020    |
| Graševina (P14)                        | G20          | P                              | 2020    |

|                 |     |   |      |
|-----------------|-----|---|------|
| Graševina (P1)  | G21 | S | 2021 |
| Graševina*      | G22 | P | 2020 |
| Graševina*      | G23 | S | 2021 |
| Graševina (P1)  | G24 | S | 2021 |
| Graševina (P7)  | G25 | S | 2020 |
| Graševina (P4)  | G26 | S | 2021 |
| Graševina (P3)  | G27 | P | 2021 |
| Graševina (P5)  | G28 | S | 2019 |
| Graševina (P6)  | G29 | S | 2019 |
| Graševina (P9)  | G30 | S | 2021 |
| Graševina (P5)  | G31 | S | 2020 |
| Graševina (P6)  | G32 | S | 2020 |
| Graševina (P12) | G33 | S | 2020 |
| Graševina (P9)  | G34 | S | 2020 |
| Graševina*      | G35 | S | 2021 |
| Graševina (P9)  | G36 | S | 2021 |

**Sample name (other varieties)**

|                 |    |   |      |
|-----------------|----|---|------|
| Chardonnay (P1) | O1 | S | 2019 |
| Pinot Gris (P1) | O2 | S | 2021 |
| Chardonnay (P3) | O3 | P | 2020 |
| Chardonnay (P4) | O4 | S | 2020 |
| Pinot Gris (P2) | O5 | S | 2020 |
| Chardonnay (P5) | O6 | S | 2020 |
| Chardonnay (P5) | O7 | S | 2021 |
| Chardonnay (P6) | O8 | S | 2021 |
| Chardonnay (P7) | O9 | S | 2021 |

---

\*Samples not statistically evaluated
